# Supplementary material for: Rapid changes in gene expression: DNA determinants of promoter regulation by the concentration of the transcription initiating NTP in Bacillus subtilis
Source: PubMed Central journal article supplement — Nucleic Acids Res. 2011 Feb 7;39(11):4598–611. doi: 10.1093/nar/gkr032 (PMC3113569; doi:10.1093/nar/gkr032), 2011-02-07
Supplement: supp_gkr032_Sojka_Supplementary.pdf [file supp_gkr032_Sojka_Supplementary.pdf]

## Supplementary material

### Legends

**Table S1.** Ribosomal RNA promoters from selected bacteria – sources of selected DNA promoter sequences for the alignment shown in the Table 2. The asterisk indicates that the same promoter sequence was found also in *Bacillus cereus* and *Bacillus thuringiensis*.

**Fig. S1.** An example of a typical gel showing *in vitro* transcriptions used for determination of  $K_{GTP}$ . The two main transcripts are indicated: (i) the test transcript (145 nt; here initiated at *rrnJ* P1); and (ii) RNA1 (108 nt) – this transcript starts from a promoter that is part of the plasmid and the transcript regulates the plasmid copy number in the cell. It is not sensitive to GTP as it initiates with ATP.

**Table S1.**

| Code | Bacterium                               | Name/NCBI      | Reference or position in the genome |
|------|-----------------------------------------|----------------|-------------------------------------|
| Bsu  | <i>Bacillus subtilis</i>                | <i>rrnB</i> P1 | (1)                                 |
| Ban* | <i>Bacillus anthracis</i>               | NC_012659.1    | 82100-82137                         |
|      | <i>Bacillus cereus</i>                  | NC_011969.1    | 82020-82056                         |
|      | <i>Bacillus thuringiensis</i>           | NC_008600.1    | 9085-9123                           |
| Bpu  | <i>Bacillus pumilus</i>                 | NC_009848.1    | 9341-9374                           |
| Lmo  | <i>Listeria monocytogenes</i>           | NC_012488.1    | 233724-233760                       |
| Pae  | <i>Paenibacillus sp.</i>                | NC_012914      | 11265-11302                         |
| Sau  | <i>Staphylococcus aureus</i>            | NC_002951.2    | 2115415-2115452                     |
| Lac  | <i>Lactobacillus acidophilus</i>        | NC_006814      | 58867-58902                         |
| Spn  | <i>Streptococcus pneumoniae</i>         | NC_012468      | 16392-16427                         |
| Cdi  | <i>Clostridium difficile</i>            | NC_009089.1    | 10649-10685                         |
| Cpe  | <i>Clostridium perfringens</i>          | NC_008261.1    | 10030-10065                         |
| Tte  | <i>Thermoanaerobacter tengcongensis</i> | NC_003869      | 83637-83673                         |
| Mag  | <i>Mycoplasma agalactiae</i>            | NC_009497      | 614890-614927                       |
| Upa  | <i>Ureaplasma parvum</i>                | NC_002162      | 145150-145186                       |
| Msm  | <i>Mycobacterium smegmatis</i>          | <i>rrn</i> P1  | (2)                                 |
| Sno  | <i>Streptomyces nodosus</i>             | <i>rrnD</i> P1 | (3)                                 |
| Eco  | <i>Escherichia coli</i>                 | <i>rrnB</i> P1 | (4)                                 |
| Vch  | <i>Vibrio cholerae</i>                  | <i>rrnA</i> P1 | (5)                                 |
| Sen  | <i>Salmonella enteritica</i>            | NC_006905      | 284848-284884                       |

**Fig. S1.**

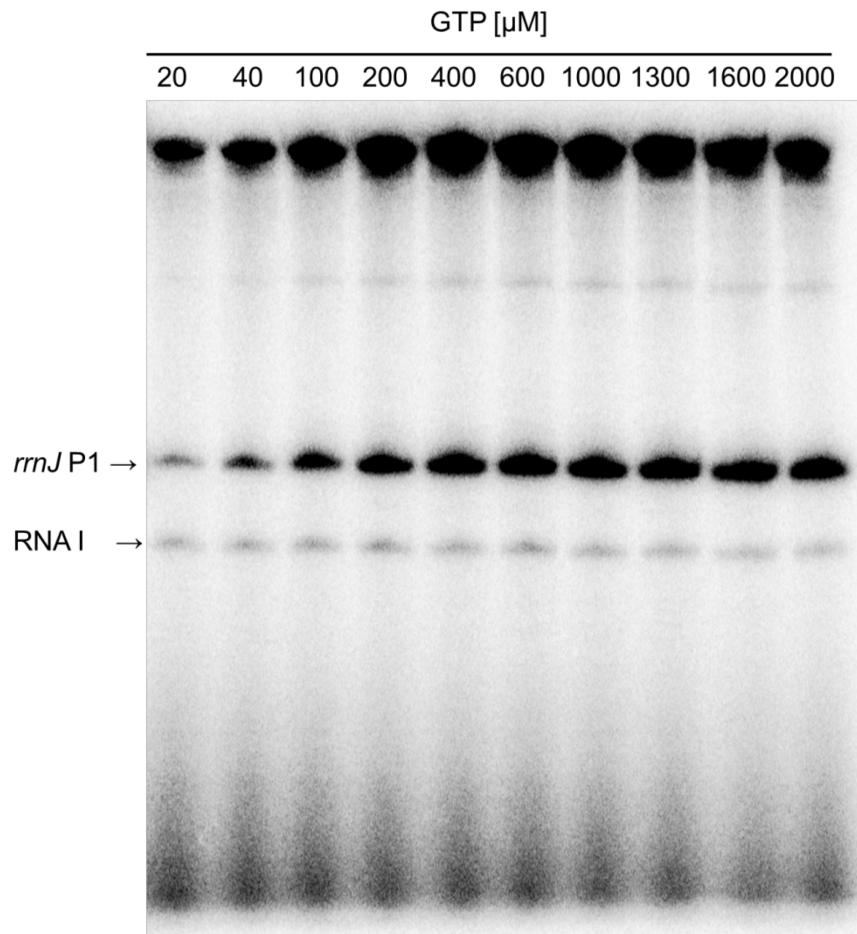

## Supplemental References

1. Krásný,L. and Gourse,R.L. (2004) An alternative strategy for bacterial ribosome synthesis: *Bacillus subtilis* rRNA transcription regulation. *EMBO J.*, **23**, 4473-83.
2. Gonzalez-y-Merchand,J.A., Colstonl,M.J., Cox,R.A., Hill,M. and Nw,L. (1996) The rRNA operons of *Mycobacterium smegmatis* and *Mycobacterium tuberculosis*: comparison of promoter elements and of neighbouring upstream genes. *Microbiology*, **142**, 667-674.
3. Yap,W.H. and Wang,Y. (1999) Molecular cloning and comparative sequence analyses of rRNA operons in *Streptomyces nodosus* ATCC 14899. *Gene*, **232**, 77-85.
4. Schneider,D.A., Gaal,T. and Gourse,R.L. (2002) NTP-sensing by rRNA promoters in *Escherichia coli* is direct. *Proc. Natl. Acad. Sci. U. S. A.*, **99**, 8602-7.
5. Aiyar,S.E., Gaal,T. and Gourse,R.L. (2002) rRNA Promoter Activity in the Fast-Growing Bacterium *Vibrio natriegens*. *J. Bacteriol.*, **184**, 1349-1358.
